# Supplementary material
Source: MDPI journal article supplement (https://www.mdpi.com/2076-3417/8/9/1461)
Supplement: s1 [file s1]

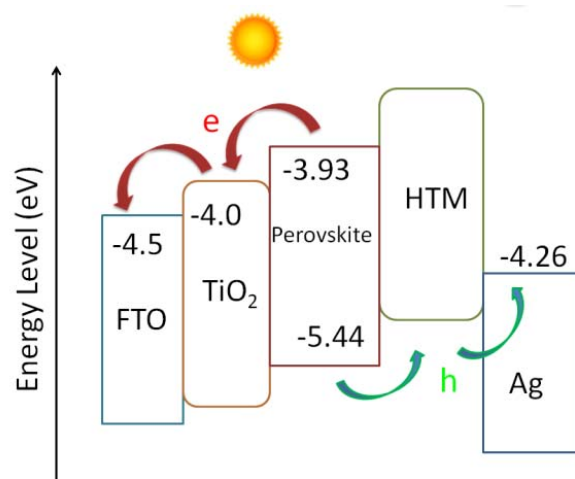

**Figure S1.** Working principle of PeSCs, where the perovskite layer sandwiched by an electron transfer materials (ETM) and a hole transfer materials (HTM) as a whole is placed between a transparent electrode (FTO) and a metal electrode (Ag).
